# Supplementary material
Source: publisher site journal article supplement (https://www.spandidos-publications.com/1208/downloadSupplementary)

Figure S1. ROS accumulation and differential expression of several important genes in the combination group. (A) Significant ROS accumulation was observed in the combination group. (B) Confirmation of the RNA sequencing data analysis for several important genes, which were differentially expressed in the combination group. Data are presented as the mean  $\pm$  SEM. \* $P < 0.05$ , \*\* $P < 0.01$ , \*\*\* $P < 0.001$ . ROS, reactive oxygen species; EGFR, epidermal growth factor receptor; COX5B, cytochrome c oxidase subunit 5B; COX7C, cytochrome c oxidase subunit 7C; UBA52, ubiquitin A-52 residue ribosomal protein fusion product 1; NFKBIE, NFKB inhibitor epsilon; GADD45A, growth arrest and DNA damage inducible alpha.

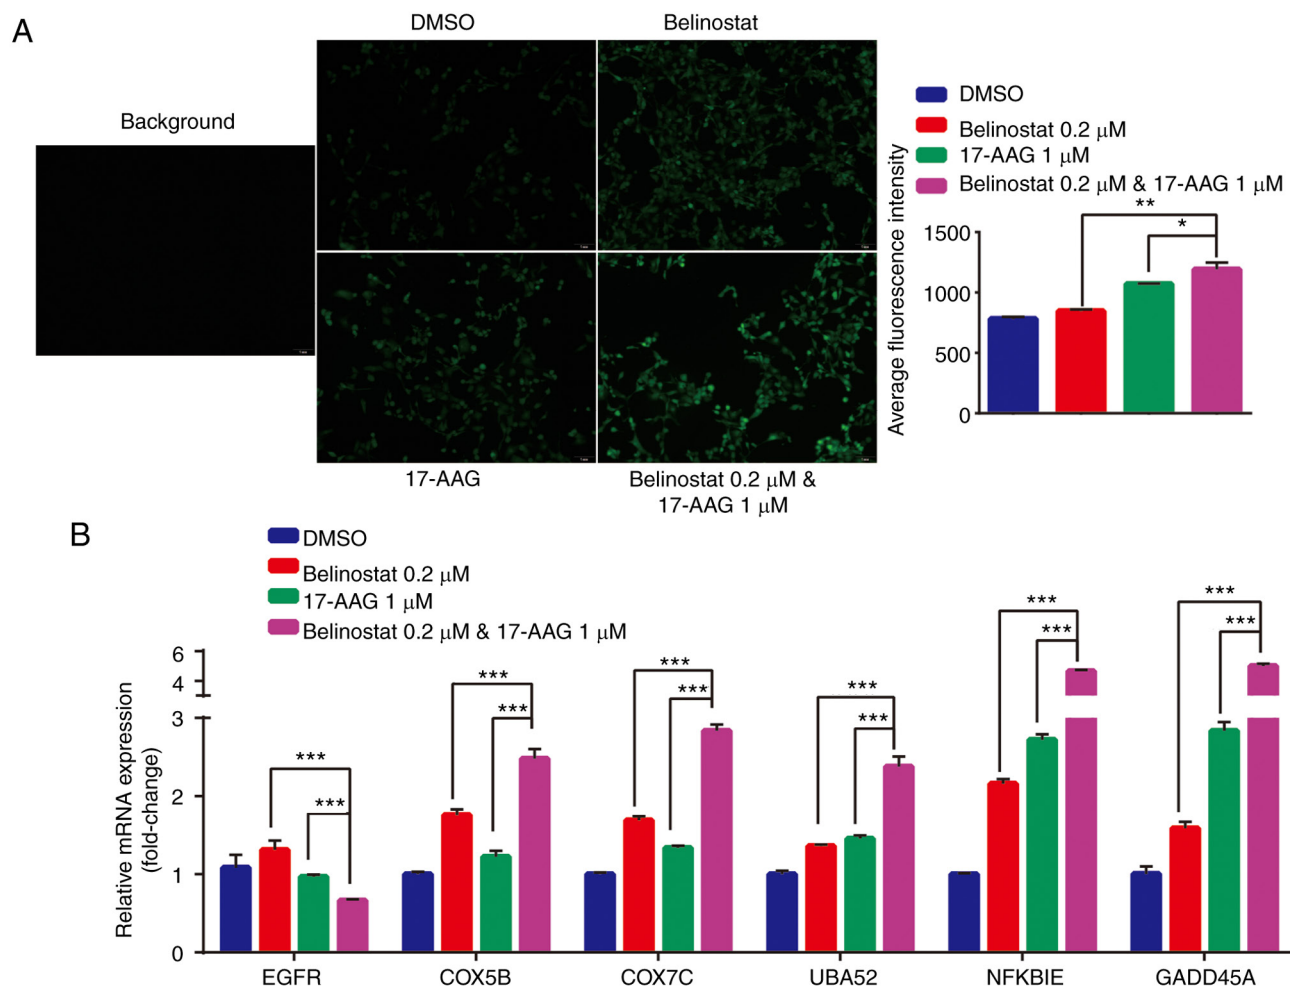

Figure S2. Knockdown efficiency of TEADs genes in MDA-MB-231 cells. TEADs genes were selected for their knockdown efficiency at (A) mRNA levels and (B) protein levels following RNA transfection. Data are presented as the mean  $\pm$  SEM. \*\*\*P<0.001. TEAD, TEA domain family member; si, small interfering RNA; NC, negative control.

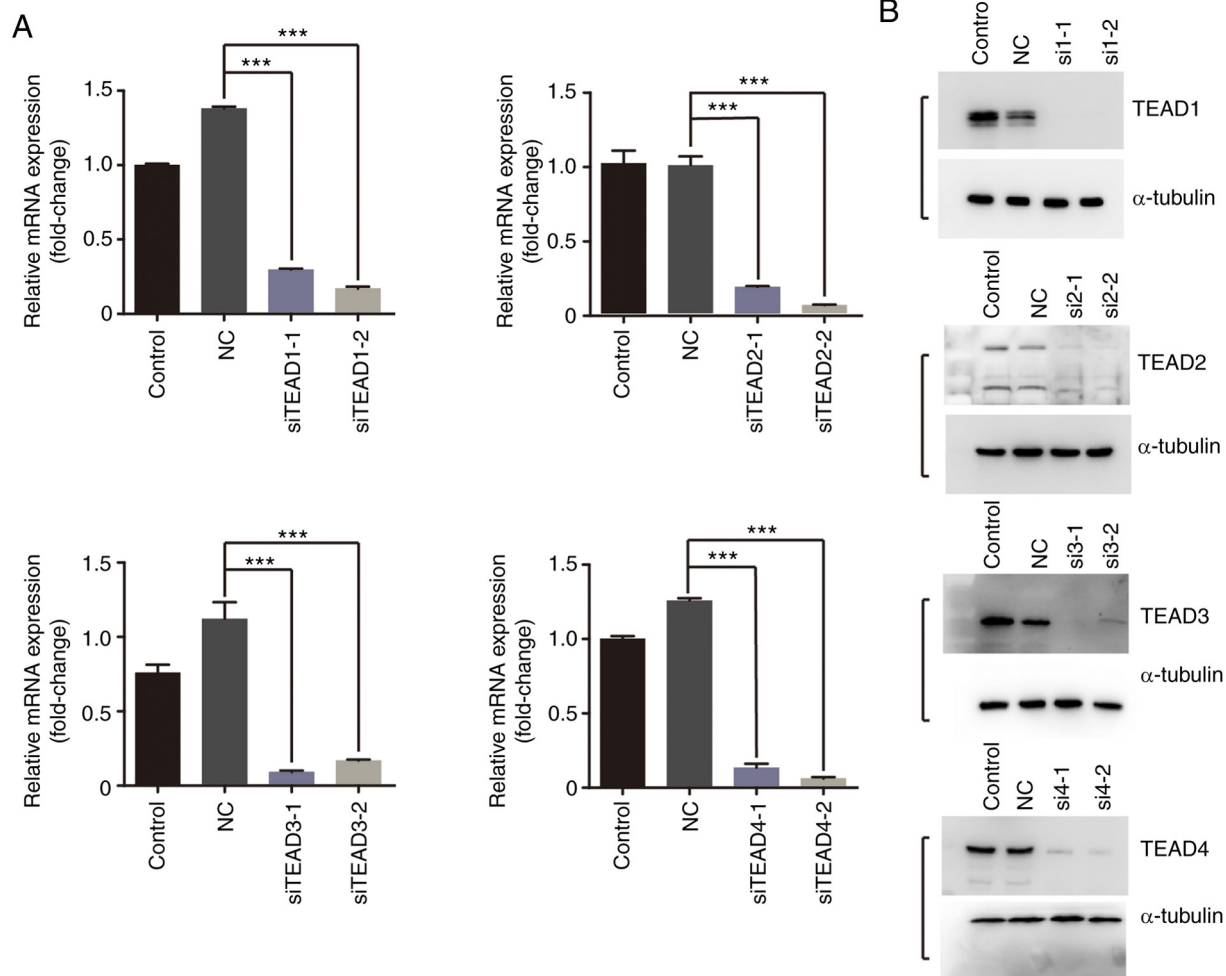

Supplement: Supplementary file 1 [file downloadSupplementary]
